# Supplementary material
Source: PubMed Central journal article supplement (PMC8451181)

**Disclosure Purpose:** 21-13891

## Summary of Interests

I do not have any interests to disclose at this time.

## Additional Questions:

- Are there other relationships or activities that readers could perceive to have influenced, or that give the appearance of potentially influencing, what you wrote in the submitted work?**  
No.
- What is the manuscript title?**  
Receipt of mRNA COVID-19 Vaccines and Risk of Self-Reported Spontaneous Abortions: CDC v-safe COVID-19 Pregnancy Registry
- Are you the corresponding author?**  
No.

## Certification

I certify that the information provided in this disclosure is complete and accurate.

**Disclosure Purpose:** 21-13891

Summary of Interests

I do not have any interests to disclose at this time.

Additional Questions:

1. **Are there other relationships or activities that readers could perceive to have influenced, or that give the appearance of potentially influencing, what you wrote in the submitted work?**

No.

2. **What is the manuscript title?**

Receipt of mRNA COVID-19 Vaccines and Risk of Self-Reported Spontaneous Abortions: CDC v-safe COVID-19 Pregnancy Registry

3. **Are you the corresponding author?**

Yes.

a. **Please list the other authors' names here.**

Lauren Head Zauche, Bailey Wallace, Ashley N. Smoots, Christine K. Olson, Titilope Oduyebo, Shin Y. Kim, Emily E. Petersen, Jun Ju, Jennifer Beauregard, Allen J. Wilcox, Charles E. Rose, Dana Meaney-Delman

Certification

I certify that the information provided in this disclosure is complete and accurate.

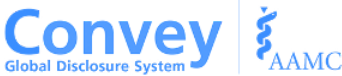

**Disclosure Purpose:** 21-13891

**Summary of Interests**

I do not have any interests to disclose at this time.

**Additional Questions:**

- 1. **Are there other relationships or activities that readers could perceive to have influenced, or that give the appearance of potentially influencing, what you wrote in the submitted work?**  
No.
- 2. **What is the manuscript title?**  
Receipt of mRNA COVID-19 Vaccines and Risk of Self-Reported Spontaneous Abortions: CDC v-safe COVID-19 Pregnancy Registry
- 3. **Are you the corresponding author?**  
No.

**Certification**

I certify that the information provided in this disclosure is complete and accurate.

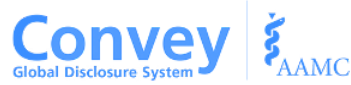

**Disclosure Purpose:** 21-13891

**Summary of Interests**

I do not have any interests to disclose at this time.

**Additional Questions:**

- 1. **Are there other relationships or activities that readers could perceive to have influenced, or that give the appearance of potentially influencing, what you wrote in the submitted work?**  
No.
- 2. **What is the manuscript title?**  
Receipt of mRNA COVID-19 Vaccines and Risk of Self-Reported Spontaneous Abortions: CDC v-safe COVID-19 Pregnancy Registry
- 3. **Are you the corresponding author?**  
No.

**Certification**

I certify that the information provided in this disclosure is complete and accurate.

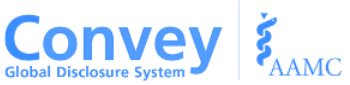

**Disclosure Purpose:** 21-13891

### Summary of Interests

I do not have any interests to disclose at this time.

### Additional Questions:

- Are there other relationships or activities that readers could perceive to have influenced, or that give the appearance of potentially influencing, what you wrote in the submitted work?**  
No.
- What is the manuscript title?**  
Receipt of mRNA COVID-19 Vaccines and Risk of Self-Reported Spontaneous Abortions: CDC v-safe COVID-19 Pregnancy Registry
- Are you the corresponding author?**  
No.

### Certification

I certify that the information provided in this disclosure is complete and accurate.

**Disclosure Purpose:** 21-13891

### Summary of Interests

I do not have any interests to disclose at this time.

### Additional Questions:

- Are there other relationships or activities that readers could perceive to have influenced, or that give the appearance of potentially influencing, what you wrote in the submitted work?**  
No.
- What is the manuscript title?**  
Receipt of mRNA COVID-19 Vaccines and Risk of Self-Reported Spontaneous Abortions: CDC v-safe COVID-19 Pregnancy Registry
- Are you the corresponding author?**  
No.

### Certification

I certify that the information provided in this disclosure is complete and accurate.

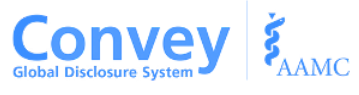

**Disclosure Purpose:** 21-13891

### Summary of Interests

I do not have any interests to disclose at this time.

### Additional Questions:

- Are there other relationships or activities that readers could perceive to have influenced, or that give the appearance of potentially influencing, what you wrote in the submitted work?**  
No.
- What is the manuscript title?**  
Receipt of mRNA COVID-19 vaccines and risk of self-reported spontaneous abortions, CDC v-safe COVID-19 Pregnancy Registry
- Are you the corresponding author?**  
No.

### Certification

I certify that the information provided in this disclosure is complete and accurate.

**Disclosure Purpose:** 21-13891

**Summary of Interests**

I do not have any interests to disclose at this time.

**Additional Questions:**

- 1. **Are there other relationships or activities that readers could perceive to have influenced, or that give the appearance of potentially influencing, what you wrote in the submitted work?**  
No.
- 2. **What is the manuscript title?**  
Receipt of mRNA COVID-19 Vaccines and Risk of Self-Reported Spontaneous Abortions: CDC v-safe COVID-19 Pregnancy Registry
- 3. **Are you the corresponding author?**  
No.

**Certification**

I certify that the information provided in this disclosure is complete and accurate.

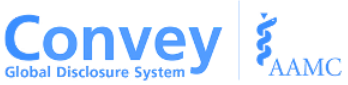



**Disclosure Purpose:** 21-13891

**Summary of Interests**

I do not have any interests to disclose at this time.

**Additional Questions:**

- 1. Are there other relationships or activities that readers could perceive to have influenced, or that give the appearance of potentially influencing, what you wrote in the submitted work?**  
No.
- 2. What is the manuscript title?**  
Receipt of mRNA COVID-19 Vaccines and Risk of Self-Reported Spontaneous Abortions
- 3. Are you the corresponding author?**  
No.

**Certification**

I certify that the information provided in this disclosure is complete and accurate.



**Disclosure Purpose:** 21-13891

### Summary of Interests

I do not have any interests to disclose at this time.

### Additional Questions:

- Are there other relationships or activities that readers could perceive to have influenced, or that give the appearance of potentially influencing, what you wrote in the submitted work?**  
No.
- What is the manuscript title?**  
Receipt of mRNA COVID-19 Vaccines and Risk of Self-Reported Spontaneous Abortions: CDC v-safe COVID-19 Pregnancy Registry
- Are you the corresponding author?**  
No.

### Certification

I certify that the information provided in this disclosure is complete and accurate.

**Disclosure Purpose:** 21-13891

## Summary of Interests

I do not have any interests to disclose at this time.

## Additional Questions:

- Are there other relationships or activities that readers could perceive to have influenced, or that give the appearance of potentially influencing, what you wrote in the submitted work?**  
No.
- What is the manuscript title?**  
Receipt of mRNA COVID-19 Vaccines and Risk of Self-Reported Spontaneous Abortions: CDC v-safe COVID-19 Pregnancy Registry
- Are you the corresponding author?**  
No.

## Certification

I certify that the information provided in this disclosure is complete and accurate.

**Disclosure Purpose:** 21-13891

**Summary of Interests**

I do not have any interests to disclose at this time.

**Additional Questions:**

- 1. **Are there other relationships or activities that readers could perceive to have influenced, or that give the appearance of potentially influencing, what you wrote in the submitted work?**  
No.
- 2. **What is the manuscript title?**  
mRNA COVID-19 Vaccines and Risk of Self-Reported Spontaneous Abortions: CDC v-safe COVID-19 Pregnancy Registry
- 3. **Are you the corresponding author?**  
No.

**Certification**

I certify that the information provided in this disclosure is complete and accurate.



**Disclosure Purpose:** 21-13891

**Summary of Interests**

I do not have any interests to disclose at this time.

**Additional Questions:**

- 1. **Are there other relationships or activities that readers could perceive to have influenced, or that give the appearance of potentially influencing, what you wrote in the submitted work?**  
No.
- 2. **What is the manuscript title?**  
Receipt of mRNA COVID-19 Vaccines and Risk of Self-Reported Spontaneous Abortions: CDC v-safe COVID-19 Pregnancy Registry
- 3. **Are you the corresponding author?**  
No.

**Certification**

I certify that the information provided in this disclosure is complete and accurate.



Supplement: NEJMc2113891_disclosures.pdf [file NEJMc2113891_disclosures.pdf]
