# Supplementary material
Source: PubMed Central journal article supplement (PMC8451181)
Supplement: NEJMc2113891_appendix.pdf [file NEJMc2113891_appendix.pdf]

## Supplementary Appendix

This appendix has been provided by the authors to give readers additional information about their work.

Supplement to: Zauche LH, Wallace B, Smoots AN, et al. Receipt of mRNA Covid-19 vaccines and risk of spontaneous abortion. *N Engl J Med*. DOI: 10.1056/NEJMc2113891

## Table of Contents

|                                                                                                                                                                                                                                                            |    |
|------------------------------------------------------------------------------------------------------------------------------------------------------------------------------------------------------------------------------------------------------------|----|
| Authors.....                                                                                                                                                                                                                                               | 2  |
| Investigators.....                                                                                                                                                                                                                                         | 3  |
| Acknowledgements.....                                                                                                                                                                                                                                      | 5  |
| Methods.....                                                                                                                                                                                                                                               | 6  |
| Description of comparator populations.....                                                                                                                                                                                                                 | 7  |
| Table S1: Population characteristics of comparator studies .....                                                                                                                                                                                           | 9  |
| Supplementary Figure 1. Flow diagram of participants enrolled in the CDC v-safe pregnancy registry ....                                                                                                                                                    | 10 |
| Table S2. Pregnancy Status at 20 Weeks' Gestation among Pregnant People Receiving mRNA COVID-19 Vaccines in the Preconception Period and through 20 Weeks' Gestation, CDC v-safe COVID-19 Vaccine Pregnancy Registry: December 14, 2020-July 19, 2021..... | 11 |
| Table S3. Cumulative risk of spontaneous abortion among CDC v-safe COVID-19 Vaccine Pregnancy Registry participants by age group, December 14, 2020-July 19, 2021.....                                                                                     | 14 |
| References .....                                                                                                                                                                                                                                           | 15 |

## Authors

Lauren Head Zauche, Ph.D., M.S.N.<sup>1,2</sup>, Bailey Wallace, M.P.H.,<sup>3</sup> Ashley N. Smoots, M.P.H.,<sup>3</sup> Christine K. Olson, M.D., M.P.H.,<sup>4,5</sup> Titilope Oduyebo, M.D., M.P.H.,<sup>3</sup> Shin Y. Kim, M.P.H.<sup>1</sup>, Emily E. Petersen, M.D.,<sup>3,5</sup> Jun Ju, M.S.,<sup>6</sup> Jennifer Beauregard, Ph.D., M.P.H.,<sup>3,5</sup> Allen J. Wilcox, M.D., Ph.D.,<sup>7</sup> Charles E. Rose, Ph.D.<sup>1</sup>, Dana Meaney-Delman, M.D. M.P.H.,<sup>1</sup> Sascha R. Ellington, Ph.D., M.S.P.H.<sup>3</sup> for the CDC v-safe COVID-19 pregnancy registry team

<sup>1</sup>National Center on Birth Defects and Developmental Disabilities, Centers for Disease Control and Prevention, Atlanta, GA

<sup>2</sup>Oak Ridge Institute for Science and Education, U.S. Department of Energy, Oak Ridge, TN, USA

<sup>3</sup>Division of Reproductive Health, National Center for Chronic Disease Prevention and Health Promotion, Centers for Disease Control and Prevention, Atlanta, GA

<sup>4</sup>Immunization Safety Office, Division of Healthcare Quality Promotion, Centers for Disease Control and Prevention, Atlanta, GA

<sup>5</sup>United States Public Health Service, Commissioned Corps, Rockville, MD

<sup>6</sup>National Institute for Occupational Health and Safety, Centers for Disease Control and Prevention, Atlanta, GA

<sup>7</sup>Epidemiology Branch, National Institute of Environmental Health Sciences, Durham, NC

**Disclaimer:** The findings and conclusions in this article are those of the authors and do not necessarily represent the official position of the Centers for Disease Control and Prevention (CDC). Mention of a product or company name is for identification purposes only and does not constitute endorsement by the CDC or the FDA. All authors do not have any material conflicts of interest.

**Corresponding author; Address reprint requests to** Dr. Sascha Ellington at the Division of Reproductive Health, National Center for Chronic Disease Prevention and Health Promotion, Centers for Disease Control and Prevention, 1600 Clifton Rd, Atlanta, GA 30329, or at [vsafecallctr@cdc.gov](mailto:vsafecallctr@cdc.gov)

## Investigators

CDC v-safe COVID-19 Pregnancy Registry Team: Amena Abbas, M.P.H.<sup>1,2</sup>, Amanda Akosa, M.P.H.<sup>3</sup>, Dayna S. Alexander, Ph.D.<sup>4</sup>, Kathryn E. Arnold, M.D.<sup>3</sup>, Jamal Bankhead, Dr.P.H.<sup>5</sup>, Tabatha Barber, Ph.D.<sup>6</sup>, Amy Blum, M.H.S.A.<sup>7</sup>, Ellen Boundy, Sc.D.<sup>8</sup>, Virginia B. Bowen, PhD.<sup>9</sup>, Kailyn M. Brooks, M.P.H.<sup>2,10</sup>, Cheryl Broussard, Ph.D.<sup>3</sup>, Tara Brown, M.P.H.<sup>11</sup>, Veronica K. Burkel, M.P.H.<sup>3</sup>, Gyan Chandra, M.S.<sup>10</sup>, Karen Chang, Ph.D.<sup>12</sup>, Dena Cherry-Brown, M.P.H.<sup>3</sup>, Monica DiRienzo, M.A.<sup>13</sup>, Tuyen Do, B.S.C.S.<sup>14</sup>, Charise Fox, M.P.H.<sup>2,3</sup>, Julianne M. Gee, M.P.H.<sup>15</sup>, Robbie Gray, A.S.<sup>16</sup>, Caitlin J. Green, M.P.H.<sup>3</sup>, Jennifer Hamborsky, M.P.H.<sup>17</sup>, Anne M. Hause, Ph.D.<sup>15</sup>, Jennifer Hegle, M.P.H.<sup>18</sup>, Obehi Ilenikhena, M.P.H.<sup>19</sup>, Jessly Joy, M.P.H.<sup>20</sup>, Ashley Judge, M.P.H.<sup>2,3</sup>, Alaya Koneru, M.P.H.<sup>17</sup>, Zanie Leroy, M.D.<sup>21</sup>, Birook Mekonnen, M.P.H.<sup>2,13</sup>, Anne Moorman, M.P.H.<sup>22</sup>, Pedro L. Moro, M.D.<sup>15</sup>, John F. Nahabedian III, M.S.<sup>3</sup>, Morgan Nail, B.S.<sup>2,23</sup>, Andrea Neiman, Ph.D.<sup>1</sup>, Kimberly Newsome, M.P.H.<sup>13</sup>, Suzanne Newton, M.P.H.<sup>3</sup>, Keydra Phillips Oladapo, Ph.D.<sup>5</sup>, Nicole S. Olgun, Ph.D.<sup>6</sup>, H. Pamela Pagano, Dr.P.H.<sup>10</sup>, Lakshmi Panagiotakopoulos, M.D.<sup>22</sup>, Youngjoo Park, M.P.H.<sup>2,3</sup>, Corrine Parker, Pharm.D.<sup>12</sup>, Kara Polen, M.P.H.<sup>3</sup>, Emmitt Rathore, B.S.<sup>3</sup>, Tom T. Shimabukuro, M.D.<sup>15</sup>, Penelope Strid, M.P.H.<sup>10</sup>, Jennifer M. Swanson, M.P.H.<sup>18</sup>, Ayzsa F. Tannis, M.P.H.<sup>2,3</sup>, Naomi K. Tepper, M.D.<sup>3</sup>, Letha Thomas, Ph.D.<sup>18</sup>, Lindsey A. Torre, M.S.P.H.<sup>18</sup>, Emmy L. Tran, Pharm.D.<sup>3</sup>, Susanna L. Trost, M.P.H.<sup>2,10</sup>, Diana Valencia, M.S.<sup>3</sup>, Jennifer L. Wilkers, M.P.H.<sup>2,10</sup>, Luke Yip, M.D.<sup>24</sup>, and Sarah Zohdy, Ph.D.<sup>25</sup>

<sup>1</sup>Division of Heart Disease and Stroke Prevention, National Center for Chronic Disease Prevention and Health Promotion, CDC; <sup>2</sup>Oak Ridge Institute for Science and Education; <sup>3</sup>Division of Birth Defects and Infant Disorders, National Center on Birth Defects and Developmental Disabilities, CDC; <sup>4</sup>Division of Diabetes and Translation, National Center for Chronic Disease Prevention and Health Promotion, CDC; <sup>5</sup>Division of HIV/AIDS Prevention National Center for HIV/AIDS, Viral Hepatitis, STD, and TB prevention; <sup>6</sup>Health Effects Laboratory Division, National Institute for Occupational Safety and Health, CDC; <sup>7</sup>Division of Health Care Statistics, National Center for Health Statistics, CDC; <sup>8</sup>Division of Nutrition, Physical Activity, and Obesity, National Center for Chronic Disease Prevention and Health

Promotion, CDC; <sup>9</sup>Division of Sexually Transmitted Disease Prevention, National Center for HIV/AIDS, Vital Hepatitis, STD and TB Prevention, CDC; <sup>10</sup>Division of Reproductive Health, National Center for Chronic Disease Prevention and Health Promotion; <sup>11</sup>Division of Viral Diseases, National Center for Immunization and Respiratory Diseases, CDC; <sup>12</sup>Division of Preparedness and Emerging Infections, National Center for Emerging and Zoonotic Infectious Diseases, CDC; <sup>13</sup>Division of Human Development and Disability, National Center on Birth Defects and Developmental Disabilities, CDC; <sup>14</sup>Office of the Director, National Center for Emerging and Zoonotic Infectious Diseases, CDC; <sup>15</sup>Division of Healthcare Quality Promotion, National Center for Emerging and Zoonotic Infectious Diseases, CDC; <sup>16</sup>Office of the Chief Operating Officer, Office of the Director, CDC; <sup>17</sup>Immunization Services Division, National Center for Immunization and Respiratory Diseases, CDC; <sup>18</sup>Division of Global HIV and TB, Center for Global Health, CDC; <sup>19</sup>Division of Performance Improvement and Field Services, Center for State, Tribal, Local and Territorial Support, CDC; <sup>20</sup>Division of Analysis and Epidemiology, National Center for Health Statistics, CDC; <sup>21</sup>Division of Population Health, National Center for Chronic Disease Prevention and Health Promotion, CDC; <sup>22</sup>Division of Viral Hepatitis, National Center for HIV/AIDS, Viral Hepatitis, STD, and TB Prevention, CDC; <sup>23</sup>Division of Laboratory Sciences, National Center for Environmental Health, CDC; <sup>24</sup>National Center for Environmental Health/Agency for Toxic Substances and Disease Registry, Office of Emergency Management, CDC; <sup>25</sup>Division of Parasitic Disease Malaria, Center for Global Health, CDC.

## Acknowledgements

We would like to thank the v-safe participants for their participation in the v-safe pregnancy registry and the members of the CDC COVID-19 Response Team for their support and contributions. We would also like to thank Ronghui (Lily) Xu, Ph.D., Department of Family Medicine and Public Health, Department of Mathematics, University of California San Diego, and Margaret Honein, Ph.D., Division of Preparedness and Emerging Infections, National Center for Emerging and Zoonotic Infectious Diseases, CDC for their statistical analysis consultation and Anne Marie Jukic, Ph.D. Epidemiology Branch, National Institute of Environmental Health Sciences, NIH, as an internal reviewer.

This project was supported in part by appointments to the Research Participation Program at the Centers for Disease Control and Prevention administered by the Oak Ridge Institute for Science and Education through an interagency agreement between the U.S. Department of Energy and the Centers for Disease Control and Prevention and by the Intramural Program of the National Institute of Environmental Health Sciences, National Institutes of Health.

## Methods

### *Study design*

V-safe and the v-safe pregnancy registry have been described previously.<sup>1-3</sup> Briefly, v-safe is a smartphone-based tool available for all people who have received a COVID-19 vaccination in the United States. Enrollment is voluntary, and participants complete web surveys which include questions about pregnancy status at the time of vaccination and since vaccination.<sup>2</sup> Persons who report that they were pregnant at the time of vaccination or since vaccination and are 18 years or older are contacted by telephone and invited to enroll in the v-safe pregnancy registry. Enrolled participants receive a telephone follow-up each trimester, during the postpartum period, and three months following live births.<sup>3</sup>

Given that the Janssen adenoviral vector COVID-19 vaccine is a different type of vaccine than mRNA COVID-19 vaccines, participants enrolled in the v-safe pregnancy registry who had received the Janssen vaccine (n=272) were not included in this analysis. At this time, there are limited data available on pregnancy outcomes in these participants because the Janssen vaccine was granted Emergency Use Authorization (EUA) several months after the mRNA COVID-19 vaccines.

This activity was reviewed by the Centers for Disease Control and Prevention (CDC) and was conducted consistent with applicable federal law and CDC policy; the activity met requirements of public health surveillance as defined in 45 CFR 46.102.<sup>4</sup>

### *Statistical Analysis*

Descriptive analyses were performed. Gestational age at vaccination was calculated using the self-reported date of vaccination, and either the self-reported estimated due date or date of the first day of the last menstrual period. When participants reported an SAB, the date of SAB was recorded based on clinical diagnosis when provided by the participant.

Life table methods were used to calculate the cumulative risk of SAB by gestational week.<sup>5</sup> Participants who received an mRNA COVID-19 vaccine preconception or before 6 weeks' of pregnancy were entered into the analysis at 6 weeks' gestation whereas participants who received their first eligible dose at or after 6 weeks' gestation entered the analysis in the week they received their first eligible dose.

Participants who did not have contact with the v-safe pregnancy registry at or after 20 weeks' gestation were censored at the time of last contact, and participants who reported other pregnancy outcomes (i.e., ectopic and molar pregnancies, induced abortions) were censored at the date of the outcome.

The cumulative probability of ongoing pregnancy for a given gestational week was calculated by taking the week-specific probability of ongoing pregnancy and the cumulative probability of ongoing pregnancy at the preceding week for each week up to the week of interest. The cumulative risk of SAB was calculated as one minus the cumulative probability of an ongoing pregnancy. Log normal confidence intervals were calculated for cumulative risk of SAB at each gestational week. The cumulative SAB risk was also age-standardized by maternal age.<sup>6</sup> Standard errors of the age-adjusted cumulative risk of SAB were estimated by dividing the age-adjusted rate by the square root of the number of SABs, and 95% confidence intervals were calculated.<sup>7</sup>

We conducted a sensitivity analysis to estimate the maximum possible risk of SAB in our cohort if all participants whom we were not able to contact in the second trimester (14-<28 weeks' gestation) experienced an SAB immediately after last contact. Statistical analyses were conducted using SAS software, version 9.4.

## Description of comparator populations

There are few high-quality epidemiologic studies of SAB risk from 6-<20 weeks, with virtually all estimates falling within the range of 11-22%.<sup>6, 8-10</sup> Given the lack of control group for this report, we used references from literature to evaluate whether the risk of SAB following COVID-19 vaccination preconception or during pregnancy was higher than what would be expected in the general population. Our registry had a higher percentage of White women than some other cohorts,<sup>8,9</sup> but registry participants had other characteristics predisposing them to higher risk of SAB, including older age<sup>6,8,9,10</sup> and a higher proportion with SAB in a previous pregnancy<sup>6,9,10</sup> (Table S1).

Both Goldhaber & Fireman, 1991 and Li et al., 2002 used a cohort from the Kaiser Permanente Medical Group in Northern California.<sup>8,9</sup> Goldhaber & Fireman, 1991 estimated a 13.0% cumulative risk



of SAB from 5-<20 weeks' gestation and a 11.1% cumulative risk of SAB from 6-<20 weeks' gestation.<sup>8</sup> We used the 11.1% cumulative risk estimate for comparison given that other studies as well as our report examined cumulative risk of SAB from 6-<20 weeks' gestation.<sup>8</sup> The study population in Goldhaber & Friedman was 65% White whereas it was more diverse in Li et al., 2002, with 38.4% White.<sup>8,9</sup> Average maternal age was 27 years and 31 years for participants in Goldhaber and Fireman, 1991 and Li et al., 2002, respectively.<sup>8,9</sup>

The study population for Magnus et al. 2019 consisted of all registered pregnancies between 2009-2013 from three national health registries in Norway (n=421,201).<sup>6</sup> A mean maternal age was not reported, but 20.9% were aged over 35 years.<sup>6</sup> Previous SAB was reported by 18.8% of study participants.<sup>6</sup> In this paper, SAB risk ranged from 9.8% (participants aged 25-29 years) to 53.6% (participants aged 45+ years), for an overall risk of 12.8%.<sup>6</sup>

The study population for Mukherjee et al., 2013 consisted of pregnant people in the Southeastern United States, of which 77% were White and 23% were Black, and 16.6% were aged over 35 years.<sup>10</sup> Mean maternal age was 29.8 years and 26.5 years for White and Black participants, respectively.<sup>10</sup> Previous SAB was reported by 22.3% of the study participants.<sup>10</sup> In Mukherjee et al., 2013, week-specific probability of SAB from 6-<20 weeks was stratified by White and Black race. Given that most of the participants for both the v-safe pregnancy registry and Mukherjee's study were White, we used their published figure to estimate the weekly cumulative risk and total cumulative risk of SAB from 6-<20 weeks among White women. Additionally, this gave us a more conservative estimate of the risk of SAB as this risk was slightly lower among White women compared to Black women. The total cumulative risk was 19.3%.<sup>10</sup> We used the estimated weekly cumulative risk among White women in our plot comparing the weekly cumulative risk of SAB in the v-safe pregnancy registry to published data.

Table S1: Population characteristics of comparator studies

|                                                         | <b>Goldhaber and Fireman, 1991<sup>8</sup></b> | <b>Li et al., 2002<sup>9</sup></b> | <b>Magnus et al 2019<sup>6</sup></b> | <b>Mukherjee et al 2013<sup>10</sup></b> | <b>CDC v-safe</b> |
|---------------------------------------------------------|------------------------------------------------|------------------------------------|--------------------------------------|------------------------------------------|-------------------|
| <b>Study population</b>                                 | Northern California                            | Northern California                | Norway                               | Southeastern United States               | United States     |
| <b>Total # of pregnancies</b>                           | 9,055                                          | 969                                | 421,201                              | 4,052                                    | 2,456             |
| <b>Cumulative Risk of SAB 6-&lt;20 weeks' gestation</b> | 11.1%                                          | 22%                                | 12.8%                                | 21.3%                                    | 14.1%             |
| <b>Maternal age (years)</b>                             | 27                                             | 31                                 | --                                   | White: 29.8<br>Black: 26.5               | 33.5              |
| <b>Maternal age (% ≥ 35 years)</b>                      | --                                             | 24.9                               | 20.9                                 | 16.6                                     | 33.3              |
| <b>Race/ethnicity</b>                                   |                                                |                                    |                                      |                                          |                   |
| <b>White</b>                                            | 65%                                            | 38.4%                              |                                      | 77%                                      | 77%               |
| <b>Black</b>                                            |                                                | 7.0%                               |                                      | 23%                                      |                   |
| <b>Hispanic</b>                                         |                                                | 21.0%                              |                                      |                                          |                   |
| <b>Asian</b>                                            |                                                | 27.3%                              |                                      |                                          |                   |
| <b>Obesity</b>                                          | ---                                            | ---                                | ---                                  | 20.7%                                    | 17.8%             |
| <b>Pre-existing diabetes</b>                            | ---                                            | 2.2%                               | ---                                  | 0.6%                                     | 1.1%              |
| <b>Previous SAB</b>                                     | ---                                            | 20.4%                              | 18.8%                                | 22.3%                                    | 27.5%             |

## Supplementary Figure 1. Flow diagram of participants enrolled in the CDC v-safe pregnancy registry

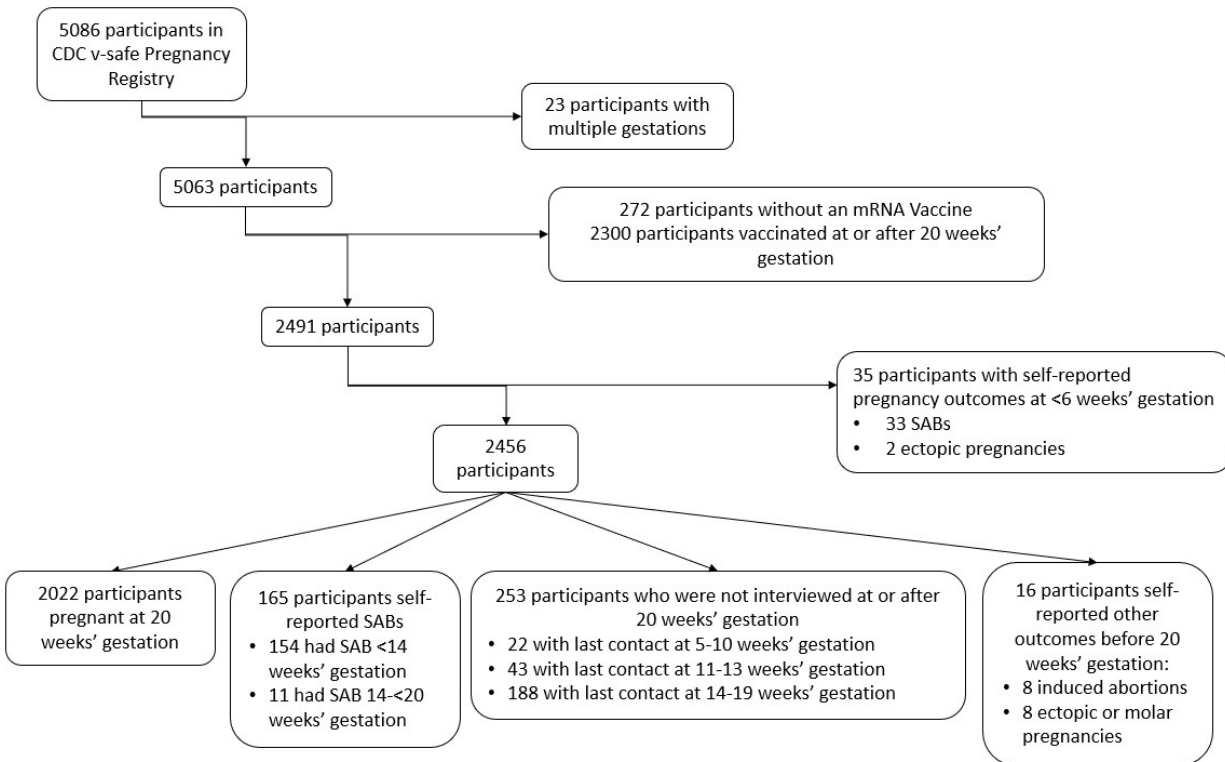

Table S2. Pregnancy Status at 20 Weeks' Gestation among Pregnant People Receiving mRNA COVID-19 Vaccines in the Preconception Period and through 20 Weeks' Gestation, CDC v-safe COVID-19 Vaccine Pregnancy Registry: December 14, 2020-July 19, 2021

| <i>Characteristics</i>                          | <i>All</i>  |          | <i>Self-reported SAB* 6-&lt;20 weeks' gestation</i> |           | <i>Ongoing pregnancies† at 20 weeks' gestation</i> |           | <i>Participants with ongoing pregnancy at contact prior to 20 weeks' gestation</i> |           | <i>Other pregnancy loss 6-&lt;20 weeks' gestation‡</i> |           |
|-------------------------------------------------|-------------|----------|-----------------------------------------------------|-----------|----------------------------------------------------|-----------|------------------------------------------------------------------------------------|-----------|--------------------------------------------------------|-----------|
|                                                 | <i>n</i>    | <i>%</i> | <i>n</i>                                            | <i>%§</i> | <i>n</i>                                           | <i>%§</i> | <i>n</i>                                                                           | <i>%§</i> | <i>n</i>                                               | <i>%§</i> |
| <b>Total</b>                                    | <b>2456</b> |          | <b>165</b>                                          |           | <b>2022</b>                                        |           | <b>253</b>                                                                         |           | <b>16</b>                                              |           |
| <b>Age at 1st eligible vaccine dose (years)</b> |             |          |                                                     |           |                                                    |           |                                                                                    |           |                                                        |           |
| 20-29                                           | 432         | 17.6     | 23                                                  | 13.9      | 343                                                | 17.0      | 64                                                                                 | 25.3      | 2                                                      | 12.5      |
| 30-34                                           | 1205        | 49.1     | 71                                                  | 43.0      | 1020                                               | 50.4      | 108                                                                                | 42.7      | 6                                                      | 37.5      |
| 35-39                                           | 693         | 28.2     | 54                                                  | 32.7      | 561                                                | 27.7      | 72                                                                                 | 28.5      | 6                                                      | 37.5      |
| 40+                                             | 126         | 5.1      | 17                                                  | 10.3      | 98                                                 | 4.8       | 9                                                                                  | 3.6       | 2                                                      | 12.5      |
| <b>Race and Hispanic origin</b>                 |             |          |                                                     |           |                                                    |           |                                                                                    |           |                                                        |           |
| Non-Hispanic White                              | 1923        | 78.3     | 1113                                                | 68.5      | 1613                                               | 79.8      | 185                                                                                | 73.1      | 12                                                     | 75.0      |
| Hispanic                                        | 220         | 9.0      | 21                                                  | 12.7      | 159                                                | 7.9       | 39                                                                                 | 15.4      | 1                                                      | 6.3       |
| Non-Hispanic Asian                              | 210         | 8.6      | 17                                                  | 10.3      | 179                                                | 8.9       | 13                                                                                 | 5.1       | 1                                                      | 6.3       |
| Non-Hispanic Multiple Races                     | 48          | 2.0      | 7                                                   | 4.2       | 34                                                 | 1.7       | 6                                                                                  | 2.4       | 1                                                      | 6.3       |
| Non-Hispanic Black                              | 35          | 1.4      | 5                                                   | 3.0       | 23                                                 | 1.1       | 6                                                                                  | 2.4       | 1                                                      | 6.3       |
| Non-Hispanic Native Hawaiian/Pacific Islander   | 8           | 0.3      | 0                                                   | 0.0       | 6                                                  | 0.3       | 2                                                                                  | 0.8       | 0                                                      | 0.0       |
| Non-Hispanic American Indian/Alaskan Native     | 7           | 0.3      | 0                                                   | 0.0       | 6                                                  | 0.3       | 1                                                                                  | 0.4       | 0                                                      | 0.0       |
| Missing                                         | 5           | 0.2      | 2                                                   | 1.2       | 2                                                  | 0.1       | 1                                                                                  | 0.4       | 0                                                      | 0.0       |
| <b>Self-reported vaccine priority group</b>     |             |          |                                                     |           |                                                    |           |                                                                                    |           |                                                        |           |
| Non-healthcare essential worker                 | 148         | 6.0      | 6                                                   | 3.6       | 110                                                | 5.4       | 30                                                                                 | 11.9      | 2                                                      | 12.5      |

| <i>Characteristics</i>                        | <i>All</i> |          | <i>Self-reported SAB* 6-&lt;20 weeks' gestation</i> |           | <i>Ongoing pregnancies† at 20 weeks' gestation</i> |           | <i>Participants with ongoing pregnancy at contact prior to 20 weeks' gestation</i> |           | <i>Other pregnancy loss 6-&lt;20 weeks' gestation‡</i> |           |
|-----------------------------------------------|------------|----------|-----------------------------------------------------|-----------|----------------------------------------------------|-----------|------------------------------------------------------------------------------------|-----------|--------------------------------------------------------|-----------|
|                                               | <i>n</i>   | <i>%</i> | <i>n</i>                                            | <i>%§</i> | <i>n</i>                                           | <i>%§</i> | <i>n</i>                                                                           | <i>%§</i> | <i>n</i>                                               | <i>%§</i> |
| Healthcare personnel <sup>  </sup>            | 2180       | 88.8     | 149                                                 | 90.3      | 1822                                               | 90.1      | 196                                                                                | 77.5      | 13                                                     | 81.3      |
| <b>Vaccine type</b>                           |            |          |                                                     |           |                                                    |           |                                                                                    |           |                                                        |           |
| Moderna                                       | 1162       | 47.3     | 85                                                  | 51.5      | 944                                                | 46.7      | 126                                                                                | 49.8      | 7                                                      | 43.8      |
| Pfizer-BioNTech                               | 1294       | 52.7     | 80                                                  | 48.5      | 1078                                               | 53.3      | 127                                                                                | 50.2      | 9                                                      | 56.3      |
| <b>Number of vaccine doses reported</b>       |            |          |                                                     |           |                                                    |           |                                                                                    |           |                                                        |           |
| 1                                             | 245        | 10.0     | 39                                                  | 23.6      | 183                                                | 9.1       | 18                                                                                 | 7.1       | 5                                                      | 31.3      |
| 2                                             | 2211       | 90.0     | 126                                                 | 76.4      | 1839                                               | 90.9      | 235                                                                                | 92.9      | 11                                                     | 68.8      |
| <b>Timing of Dose 1</b>                       |            |          |                                                     |           |                                                    |           |                                                                                    |           |                                                        |           |
| Preconception <sup>¶</sup>                    | 380        | 15.5     | 56                                                  | 33.9      | 212                                                | 10.5      | 106                                                                                | 41.9      | 6                                                      | 37.5      |
| First trimester (>=2 and <14 weeks)           | 1230       | 50.1     | 107                                                 | 64.8      | 971                                                | 48.0      | 142                                                                                | 56.1      | 10                                                     | 62.5      |
| Second trimester (>=14 and <20 weeks**)       | 846        | 34.4     | 2                                                   | 1.2       | 839                                                | 41.5      | 5                                                                                  | 2.0       | 0                                                      | 0.0       |
| <b>Timing of Dose 2 (n=2211)</b>              |            |          |                                                     |           |                                                    |           |                                                                                    |           |                                                        |           |
| Preconception <sup>¶</sup>                    | 188        | 8.5      | 19                                                  | 11.5      | 116                                                | 5.7       | 50                                                                                 | 19.8      | 3                                                      | 18.8      |
| First trimester (>=2 and <14 weeks)           | 885        | 40.0     | 91                                                  | 55.2      | 642                                                | 31.8      | 145                                                                                | 57.3      | 7                                                      | 43.8      |
| Second trimester (>=14 and <28 weeks)         | 1125       | 50.9     | 4                                                   | 2.4       | 1081                                               | 53.5      | 40                                                                                 | 15.8      | 0                                                      | 0.0       |
| After pregnancy outcome                       | 13         | 0.6      | 12                                                  | 7.3       | 0                                                  | 0.0       | 0                                                                                  | 0.0       | 1                                                      | 6.3       |
| <b>Comorbidities and past medical history</b> |            |          |                                                     |           |                                                    |           |                                                                                    |           |                                                        |           |
| Obesity <sup>††</sup>                         | 432        | 17.6     | 34                                                  | 20.6      | 340                                                | 16.8      | 57                                                                                 | 22.5      | 1                                                      | 6.3       |
| Pre-existing diabetes                         | 27         | 1.1      | 2                                                   | 1.2       | 23                                                 | 1.1       | 2                                                                                  | 0.8       | 0                                                      | 0.0       |
| Prior SAB                                     | 675        | 27.5     | 59                                                  | 35.8      | 549                                                | 27.2      | 65                                                                                 | 25.7      | 2                                                      | 12.5      |
| 1 Prior SAB                                   | 452        | 67.0     | 33                                                  | 20.0      | 373                                                | 18.4      | 44                                                                                 | 17.4      | 2                                                      | 12.5      |
| 2 or more Prior SABs                          | 223        | 33.0     | 26                                                  | 15.8      | 176                                                | 8.7       | 21                                                                                 | 8.3       | 0                                                      | 0.0       |

---

| Characteristics                                                                                                                                                        | All |   | Self-reported SAB* 6-<20 weeks' gestation |                | Ongoing pregnancies <sup>†</sup> at 20 weeks' gestation |                | Participants with ongoing pregnancy at contact prior to 20 weeks' gestation |                | Other pregnancy loss 6-<20 weeks' gestation <sup>‡</sup> |                |
|------------------------------------------------------------------------------------------------------------------------------------------------------------------------|-----|---|-------------------------------------------|----------------|---------------------------------------------------------|----------------|-----------------------------------------------------------------------------|----------------|----------------------------------------------------------|----------------|
|                                                                                                                                                                        | n   | % | n                                         | % <sup>§</sup> | n                                                       | % <sup>§</sup> | n                                                                           | % <sup>§</sup> | n                                                        | % <sup>§</sup> |
| <i>*Spontaneous abortion</i>                                                                                                                                           |     |   |                                           |                |                                                         |                |                                                                             |                |                                                          |                |
| <i>†Includes 19 live births, 5 stillbirths, 2 induced abortions after 20 weeks' gestation, and 1996 pregnancies ongoing as of last interview</i>                       |     |   |                                           |                |                                                         |                |                                                                             |                |                                                          |                |
| <i>‡Includes 8 induced abortions, 7 ectopic pregnancies, and 1 molar pregnancy</i>                                                                                     |     |   |                                           |                |                                                         |                |                                                                             |                |                                                          |                |
| <i>§Column percentages provided for each variable according to pregnancy outcome/status; these should not be interpreted as risk estimates</i>                         |     |   |                                           |                |                                                         |                |                                                                             |                |                                                          |                |
| <i>   Any person serving in a healthcare setting who has the potential for direct or indirect exposure to patients or infectious materials</i>                         |     |   |                                           |                |                                                         |                |                                                                             |                |                                                          |                |
| <i>¶ Preconception defined as 4 weeks before last menstrual period up to 2 weeks after</i>                                                                             |     |   |                                           |                |                                                         |                |                                                                             |                |                                                          |                |
| <i>**Second trimester vaccination for dose 1 limited to receipt at less than 20 weeks' gestation per study criteria</i>                                                |     |   |                                           |                |                                                         |                |                                                                             |                |                                                          |                |
| <i>†† 12 cases missing information to calculate body mass index to determine whether participant affected by obesity (BMI at or greater than 30 kg/m<sup>2</sup>).</i> |     |   |                                           |                |                                                         |                |                                                                             |                |                                                          |                |

---

Table S3. Cumulative risk of spontaneous abortion among CDC v-safe COVID-19 Vaccine Pregnancy Registry participants by age group, December 14, 2020-July 19, 2021

| <i>Age group</i> | <i>Number at risk</i> | <i>Self-reported SAB*</i> | <i>Cumulative SAB risk (% , 95% CI)</i> |
|------------------|-----------------------|---------------------------|-----------------------------------------|
| <b>20-29</b>     | 432                   | 23                        | 9.8 (5.9-13.4)                          |
| <b>30-34</b>     | 1205                  | 71                        | 13.0 (10.2-15.8)                        |
| <b>35-39</b>     | 693                   | 54                        | 16.7(12.6-20.6)                         |
| <b>40+</b>       | 126                   | 17                        | 28.8 (16.8-39.1)                        |

\*SAB=spontaneous abortion

## References

1. Shimabukuro TT, Kim SY, Myers TR, et al. Preliminary findings of mRNA Covid-19 vaccine safety in pregnant persons. *N Engl J Med.* 2021; 384: 2273-82.
2. Centers for Disease Control and Prevention. V-safe active surveillance for COVID-19 vaccine safety. January 2021. Accessed June 15, 2021. <https://www.cdc.gov/vaccinesafety/pdf/V-safe-protocol-508.pdf>.
3. Centers for Disease Control and Prevention. V-safe pregnancy surveillance (amendment). 2021. Accessed June 15, 2021. <https://www.cdc.gov/vaccinesafety/pdf/vsafe-pregnancy-surveillance-protocol-508.pdf>.
4. Department of Health and Human Services – 45 C.F.R. part 46, 21 C.F.R. part 56; 42 U.S.C. Sect. 241(d); 5 U.S.C. Sect. 552a; 44 U.S.C. Sect. 3501 et seq. Accessed June 17, 2021. <https://www.hhs.gov/ohrp/sites/default/files/ohrp/policy/ohrpreulations.pdf>.
5. Xu R, Chambers C. A sample size calculation for spontaneous abortion in observational studies. *Reproductive Toxicology.* 2011; 32: 490-3.
6. Magnus MC, Wilcox AJ, Morken NH, Weinberg CR, Haberg SE. Role of maternal age and pregnancy history in risk of miscarriage: prospective register based study. *BMJ* 2019;364:I869.
7. Keyfitz N. 3. Sampling variance of standardized mortality rates. *Hum Biol.* 1966;38:309-17.
8. Goldhaber MK, Fireman BH. The fetal life table revisited: spontaneous abortion rates in three Kaiser Permanente cohorts. *Epidemiol* 1991;2(1):33-9.
9. Li DK, Odouli R, Wi S, et al. A population-based prospective cohort study of personal exposure to magnetic fields during pregnancy and the risk of miscarriage. *Epidemiol* 2002;13: 9-20.
10. Mukherjee S, Velez Edwards DR, Baird DD, et al. Risk of miscarriage among black women and white women in a US prospective cohort study. *Am J Epidemiol* 2013; 177: 1271-8.
